# Supplementary material
Source: HighWire-hosted journal article supplement (https://www.annfammed.org/highwire/filestream/7880/field_highwire_adjunct_files/0/Chen_Appendix.pdf)
Supplement: Chen_Appendix.pdf [file Chen_Appendix.pdf]

Online Supplementary Material

Chen F, Fryer GE, Phillips RL, Wilson E, Pathman DE. Patients' beliefs about racism, preferences for physician race, and satisfaction with care. *Ann Fam Med*. 2005;3:138-143.

<http://www.annfammed.org/cgi/content/full/3/2/138/DC1>

**Supplemental Table. Discriminatory Belief Scale Contributory Items and Scale Correlations**

| Discriminatory Belief Scale Items                                                                                                             | Item-to-Scale<br>Correlation<br>(African<br>Americans) | Item-to-Scale<br>Correlation<br>(Latinos) |
|-----------------------------------------------------------------------------------------------------------------------------------------------|--------------------------------------------------------|-------------------------------------------|
| 1. How often do you think our health care system treats people unfairly based on what their race or ethnic background is?                     | .51                                                    | .50                                       |
| 2. How often do you think a person's race or ethnic background affects whether they can get routine medical care when they need it?           | .55                                                    | .46                                       |
| 3. Is racism a major problem in health care?                                                                                                  | .63                                                    | .58                                       |
| 4. How often do you think racism occurs when a patient and doctor are of different racial or ethnic backgrounds?                              | .61                                                    | .56                                       |
| 5. How often does racism occur if the patient and doctor are of the same racial or ethnic background?                                         | .38                                                    | .28                                       |
| 6. Do you think most African -Americans (Latinos) receive the same quality of health care as whites?                                          | .40                                                    | .45                                       |
| 7. For the average African American (Latino), how big a problem is being able to afford the cost of health insurance and medical care?        | .39                                                    | .36                                       |
| 8. For the average African American (Latino), how big a problem is having enough physicians and other health providers near where they live?  | .40                                                    | .42                                       |
| 9. For the average African American (Latino), how big a problem is having difficulty getting care because of their race or ethnic background? | .64                                                    | .60                                       |
| Total scale $\alpha$                                                                                                                          | .81                                                    | .78                                       |
